# Supplementary material for: Expression of ACE2, TMPRSS2 and CTSL in human airway epithelial cells under physiological and pathological conditions: Implications for SARS-CoV-2 infection
Source: bioRxiv or medRxiv preprint supplement (doi:10.1101/2020.08.06.240796), 2020-08-07
Supplement: Supplementary file [file media-1.pdf]

## Supplementary information

**Supplementary table 1: List of datasets recruited in this study**

| Datasets                                                                                                                                                                                                | Platform                        | Ref. (PMID)                                                | Studying focus               | Submitted time (year) | Cell type      | Sample sizes                                                                               |
|---------------------------------------------------------------------------------------------------------------------------------------------------------------------------------------------------------|---------------------------------|------------------------------------------------------------|------------------------------|-----------------------|----------------|--------------------------------------------------------------------------------------------|
| Crystal et al. Group 01 (GSE4498, GSE5058, GSE5059, GSE7832, GSE8545, GSE10006, GSE10135, GSE11784, GSE11906, GSE11952, GSE13931, GSE13933, GSE17905, GSE18385, GSE19407, GSE19667, GSE20250, GSE20257) | GPL570 [HG-U133_Plus_2]         | 18339782, 17108109, 18832735, 21829517, 19852842, 20693378 | Smoking and COPD             | 2006-2010             | AEC            | 49 COPD, 124 NS ,167 CS                                                                    |
| Crystal et al. Group 02 (GSE22047, GSE24337, GSE30063, GSE34450, GSE43939, GSE53537, GSE63127, GSE64614, GSE76324, GSE77658)                                                                            | GPL570 [HG-U133_Plus_2]         | 21325429, 22855713, 24465567, 26927796                     | Smoking and COPD             | 2010-2016             | AEC            | 36 COPD, 98 NS, 129 CS                                                                     |
| GSE994                                                                                                                                                                                                  | GPL96 [HG-U133A]                | 15210990                                                   | Smoking                      | 2004                  | BEC            | 34 CS, 18 FS, 23 NS                                                                        |
| GSE4115                                                                                                                                                                                                 | GPL96 [HG-U133A]                | 17334370                                                   | Lung cancer                  | 2006                  | BEC            | 102 LC, 90 NC                                                                              |
| GSE4302                                                                                                                                                                                                 | GPL570 [HG-U133_Plus_2]         | 17898169                                                   | Smoking and athma            | 2006                  | BEC            | 42 baseline asthma, 13 placebo treated asthma, 19 Flovent treated asthma, 16 smoker, 28 HC |
| GSE7895                                                                                                                                                                                                 | GPL96 [HG-U133A]                | 17894889                                                   | Smoking                      | 2007                  | BEC            | 52 CS, 31 FS, 21 NS                                                                        |
| GSE8987                                                                                                                                                                                                 | GPL571 [HG-U133A_2]             | 18513428                                                   | Smoking                      | 2007                  | NEC            | 7 CS, 8 NS                                                                                 |
| GSE11348                                                                                                                                                                                                | GPL570 [HG-U133_Plus_2]         | 18658112                                                   | Human rhinovirus infection   | 2008                  | NEC            | 48 Control 45 HRV                                                                          |
| GSE13396                                                                                                                                                                                                | GPL570 [HG-U133_Plus_2]         | 19710636                                                   | Human rhinovirus infection   | 2008                  | BEC            | 11 Control 11 HRV                                                                          |
| GSE14633                                                                                                                                                                                                | GPL5175 [HuEx-1_0-st]           | 19168627                                                   | Smoking                      | 2009                  | BEC            | 11 CS, 11 NS                                                                               |
| GSE18965                                                                                                                                                                                                | GPL96 [HG-U133A]                | 20110557                                                   | Asthma                       | 2009                  | BEC            | 9 Asthma, 7 HC                                                                             |
| GSE19027                                                                                                                                                                                                | GPL96 [HG-U133A]                | 20689807                                                   | Smoking and lung cancer      | 2009                  | BEC            | CA: 9 CS, 12 FS; HC: 20 CS 9 FS 9 NS                                                       |
| GSE19187                                                                                                                                                                                                | GPL6244 [HuGene-1_0-st]         | 22005912                                                   | Allergic rhinitis and asthma | 2009                  | NEC            | 7 Controled asthma,, 6 uncontrolled asthma, 11 HC, 14 Rhinitis                             |
| GSE28835                                                                                                                                                                                                | GPL13447 [HG-U133A_2]           | 21636547                                                   | Lung cancer                  | 2011                  | LAEC           | 8 LC ,5 NC                                                                                 |
| GSE37147                                                                                                                                                                                                | GPL13243 [HuGene10stv1_Hs_ENSG] | 23471465                                                   | COPD                         | 2012                  | BEC            | COPD: 30 CS, 57 FS; HC: 69 CS, 82 FS                                                       |
| GSE40445                                                                                                                                                                                                | GPL10097 [HsAirwaya520108F]     | 23537407                                                   | Cystic fibrosis              | 2012                  | NEC            | 5 CF, 5 HC                                                                                 |
| GSE44037                                                                                                                                                                                                | GPL13158 [HT_HG-U133_Plus_PM]   | 24282527                                                   | Allergic rhinitis and asthma | 2013                  | BEC            | 12 Asthma ,12 HC, 10 Rhinitis                                                              |
| GSE51392                                                                                                                                                                                                | GPL13158 [HT_HG-U133_Plus_PM]   | 24475887                                                   | Poly(I:C) stimulation        | 2013                  | BEC            | 34 Control 34 Poly(I:C)                                                                    |
| GSE54495                                                                                                                                                                                                | GPL570 [HG-U133_Plus_2]         | 25705890                                                   | Lung cancer                  | 2014                  | Peripheral AEC | 17 LC, 13 Smoker                                                                           |

|           |                           |          |                            |      |           |                                       |
|-----------|---------------------------|----------|----------------------------|------|-----------|---------------------------------------|
| GSE56341  | GPL6244 [HuGene-1_0-st]   | 24298892 | COPD                       | 2014 | Small AEC | 8 COPD, 14 FS                         |
| GSE66499  | GPL6244 [HuGene-1_0-st]   | 25981554 | Lung cancer                | 2015 | BEC       | 490 LC ,190 HC                        |
| GSE67061  | GPL17077 [Agilent-039494] | 26308599 | Lung cancer                | 2015 | AEC       | 56 LC ,17 HC                          |
| GSE70190  | GPL20609 [PrimeView]      | 26810609 | Human rhinovirus infection | 2015 | BEC       | 10 Control, 10 rhinovirus infection   |
| GSE80796  | GPL6244 [HuGene-1_0-st]   | 28376173 | Smoking and lung cancer    | 2016 | NEC       | CA: 113 CS, 196 FS; HC: 73 CS, 123 FS |
| GSE84101  | GPL570 [HG-U133_Plus_2]   | 28273093 | Smoking                    | 2016 | Small AEC | 7 SM ,7 NS                            |
| GSE97010  | GPL17244 [HuGene-1_0-st]  | 29932825 | Smoking                    | 2017 | BEC       | 63 baseline ,63 post ASE              |
| GSE112073 | GPL17556 [HuGene-1_0-st]  | 31233743 | Smoking                    | 2018 | BEC       | 9 CS, 21 FS                           |
| GSE128708 | GPL570 [HG-U133_Plus_2]   | 32432483 | COPD                       | 2019 | Small AEC | 124 COPD smoker, 84 NS                |

AEC, Airway epithelial cells; BEC, Bronchial and nasal epithelial cells; LAEC, Large airway epithelial cells; NEC, Nasal epithelial cells; NS, Never smoker; SM, Smoker; CS, Current smoker; FS, Former smoker; LC, Lung cancer; HC, Healthy control; COPD,. Chronic obstructive pulmonary disease; ASE, Acute smoking exposure.

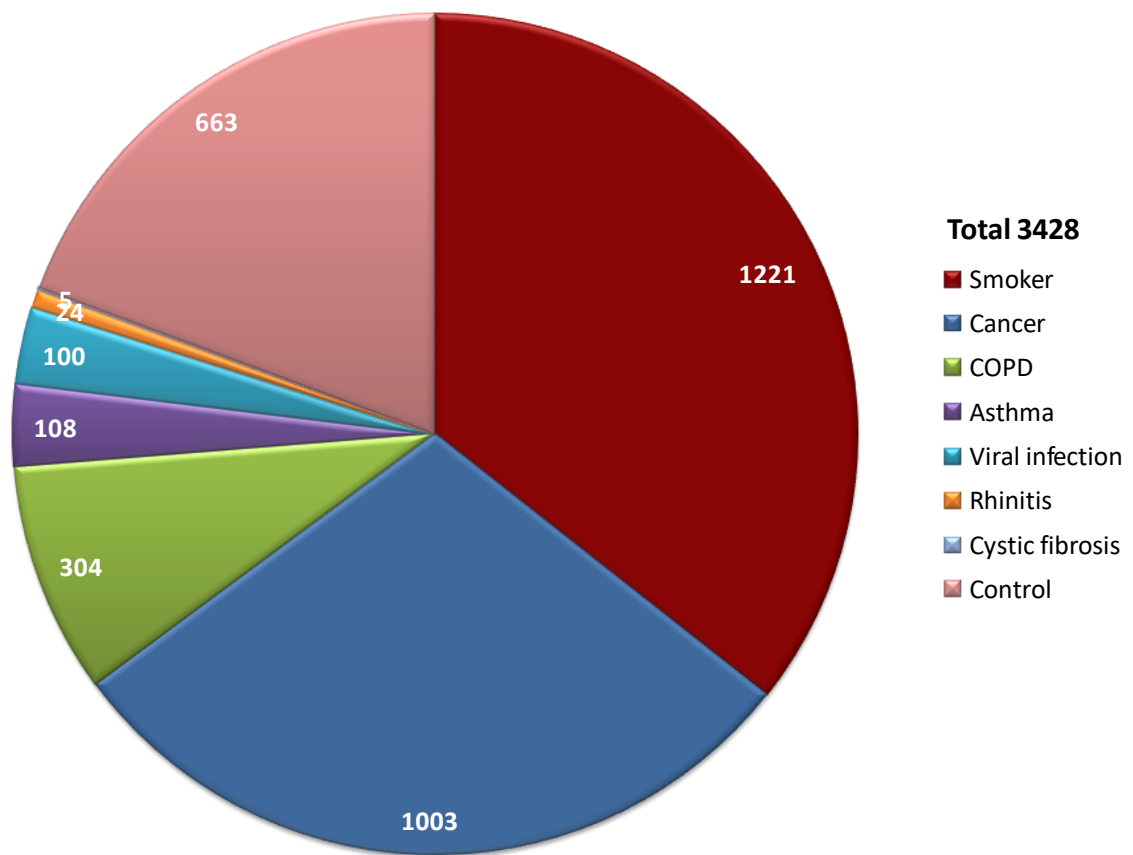

**Supplementary fig.1: Pie chart showing the composition of samples.** Control group consists of healthy never smokers, healthy subjects without information of smoking status and control samples in *in vitro* studies, while the smoker group contains healthy smokers, including both current smokers and former smokers.

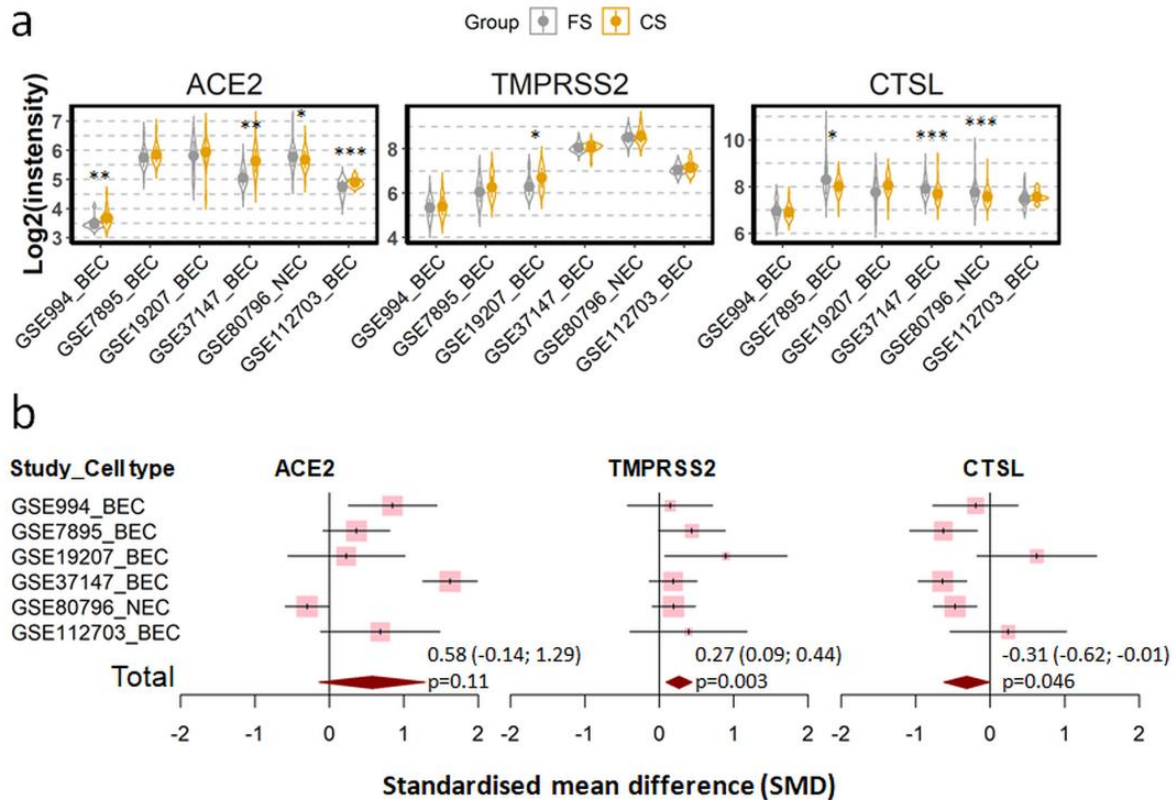

**Supplementary Fig. 2. Expression of ACE2, TMRPSS2 and cathepsin L (CTSL) in airway epithelial cells of healthy current smokers (CS) and former smokers (FS).** **a**) Violin plot of expression levels of ACE2, TMRPSS2 and CTSL in 6 datasets which contain current smokers and former smoker. The mean and standard deviation (SD) of each group were presented as dot and line, respectively. BEC, bronchial epithelial cells; NEC, nasal epithelial cells. Statistical differences were calculated by Student's t test. \* $p < 0.05$ , \*\* $p < 0.01$ , \*\*\* $p < 0.001$ . **b**) Forest plot of 6 datasets examining expression of ACE2, TMRPSS2 and CTSL in current smokers and former smokers. The x-axis indicates the standardized mean difference (SMD), while the y-axis shows GEO datasets and cell types. Each square in the plots represents the SMD in corresponding datasets and the 95% confidence interval (CI) is showed by the error bar. The size of each square represents the weight of the individual dataset in the meta-analysis. The diamonds in the bottom represent the SMD of the meta-analysis. The SMD, 95% CI and  $P$  values of meta-analysis are depicted.

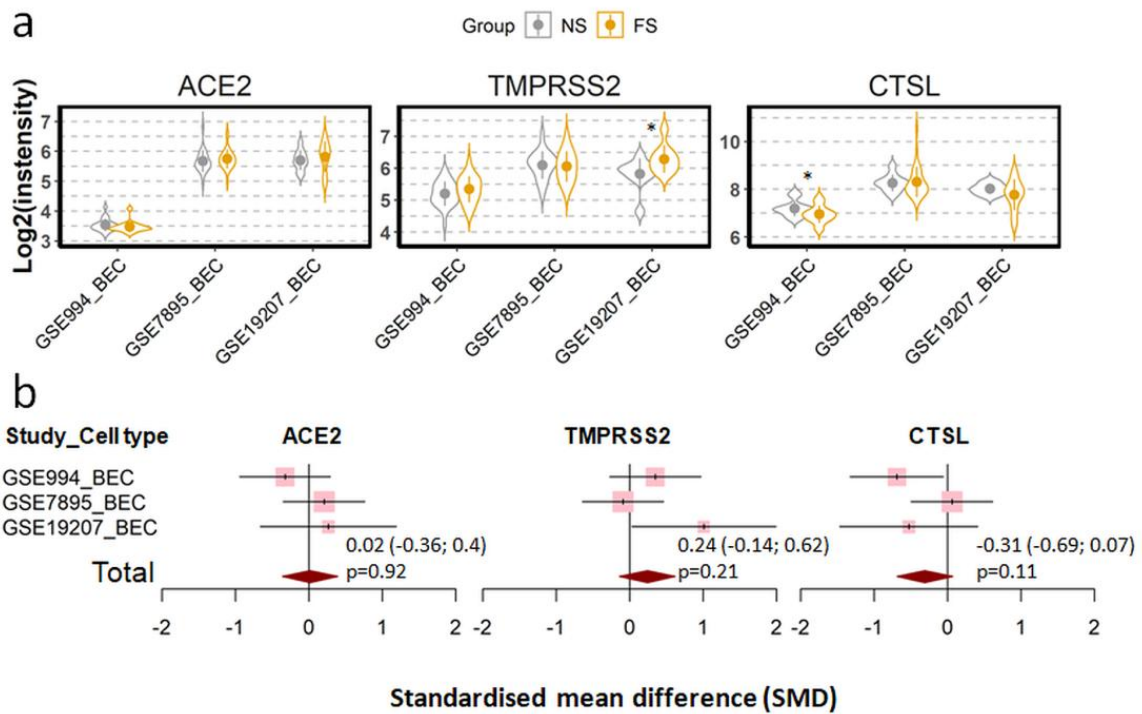

**Supplementary Fig. 3. Expression of ACE2, TMRPSS2 and cathepsin L (CTSL) in the airway epithelial cells of healthy never smokers (NS) and former smokers (FS) . a** Violin plot of expression levels of ACE2, TMRPSS2 and CTSL in 3 datasets which contain current smokers and former smoker. Statistical difference was calculated by Student's t test. \* $p < 0.05$ . **b**) Forest plot of 3 datasets examining expression of ACE2, TMRPSS2 and CTSL in never smokers and former smokers. The x-axis indicates the standardized mean difference (SMD), while the y-axis shows GEO datasets and cell types. The SMD, 95% CI and  $P$  values of meta-analysis are depicted.

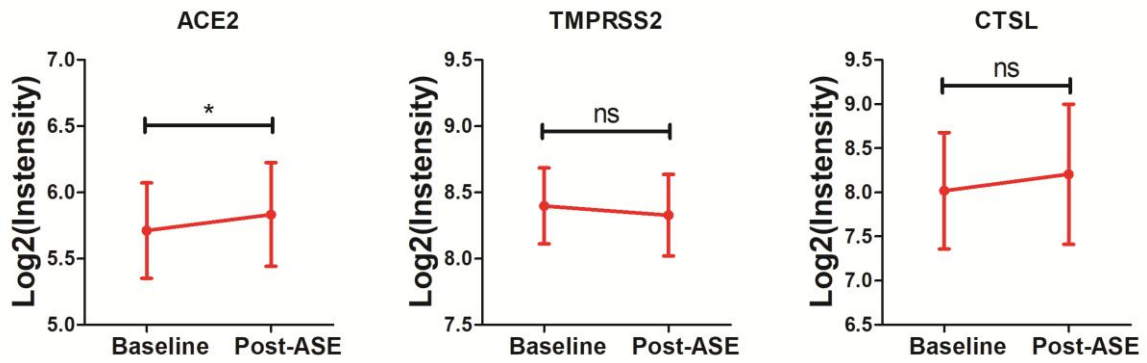

**Supplementary Fig. 4. Expression of ACE2, TMPRSS2 and cathepsin L (CTSL) in airway epithelial cells before and after acute smoke exposure (ASE) in healthy smokers in dataset GSE97010.** The post-ASE group stands for 63 smokers who were asked to refrain from cigarette smoking for at least 2 days and then subjected to ASE, while the 63 subjects obtained from smoking and underwent bronchoscopy at a separate time at least 6 wks from the post-smoking bronchoscopy to serve as an unexposed baseline group. Statistical difference was analyzed by paired Student t test. \*  $p < 0.05$ , ns. not significant.

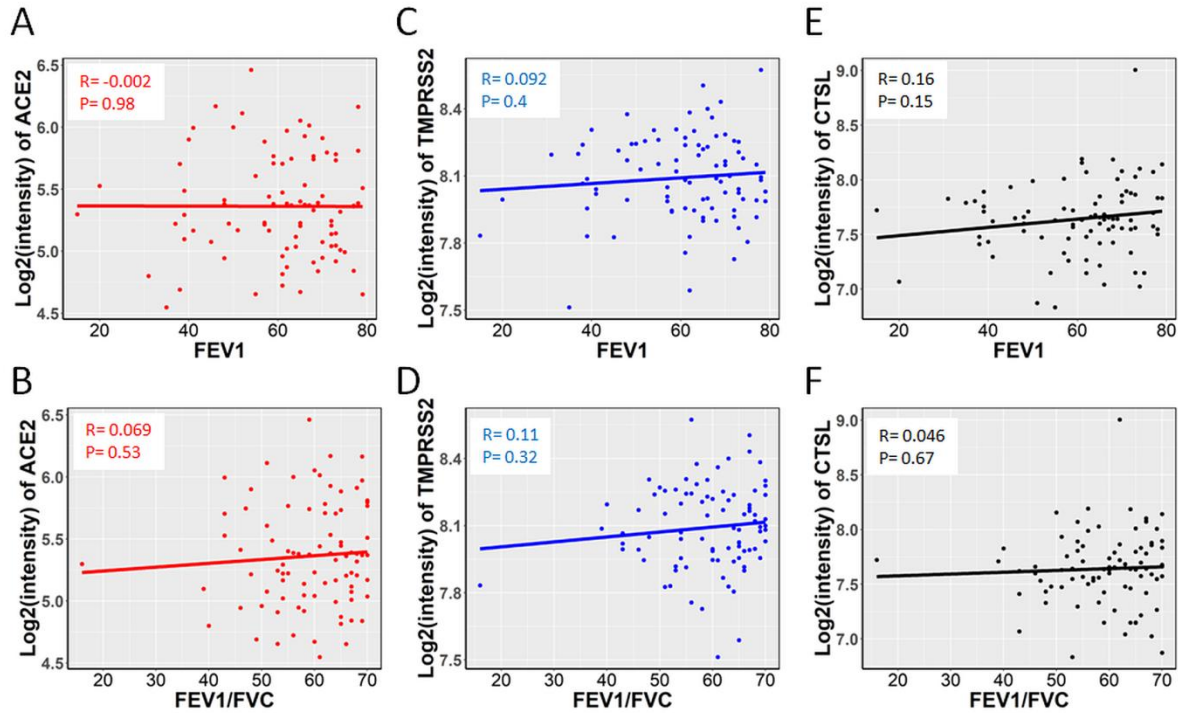

**Supplementary Fig. 5. Correlation between SARS-CoV-2 entry related genes with lung function indexes in COPD patients.** Linear regression of FEV1 (A,C,E) and FEV1/FVC (B,D,F) with expression of ACE2 (A,B), TMPRSS2 (C,D) and cathepsin L (CTSL) (E,F). Data are from dataset GSE37147. FEV1, the first second of forced expiration to the full; FVC, forced vital capacity; FEV1/FVC, ratio of FEV1 and FVC. *P* values and correlation coefficient (*R*) calculated by pearson method are depicted.

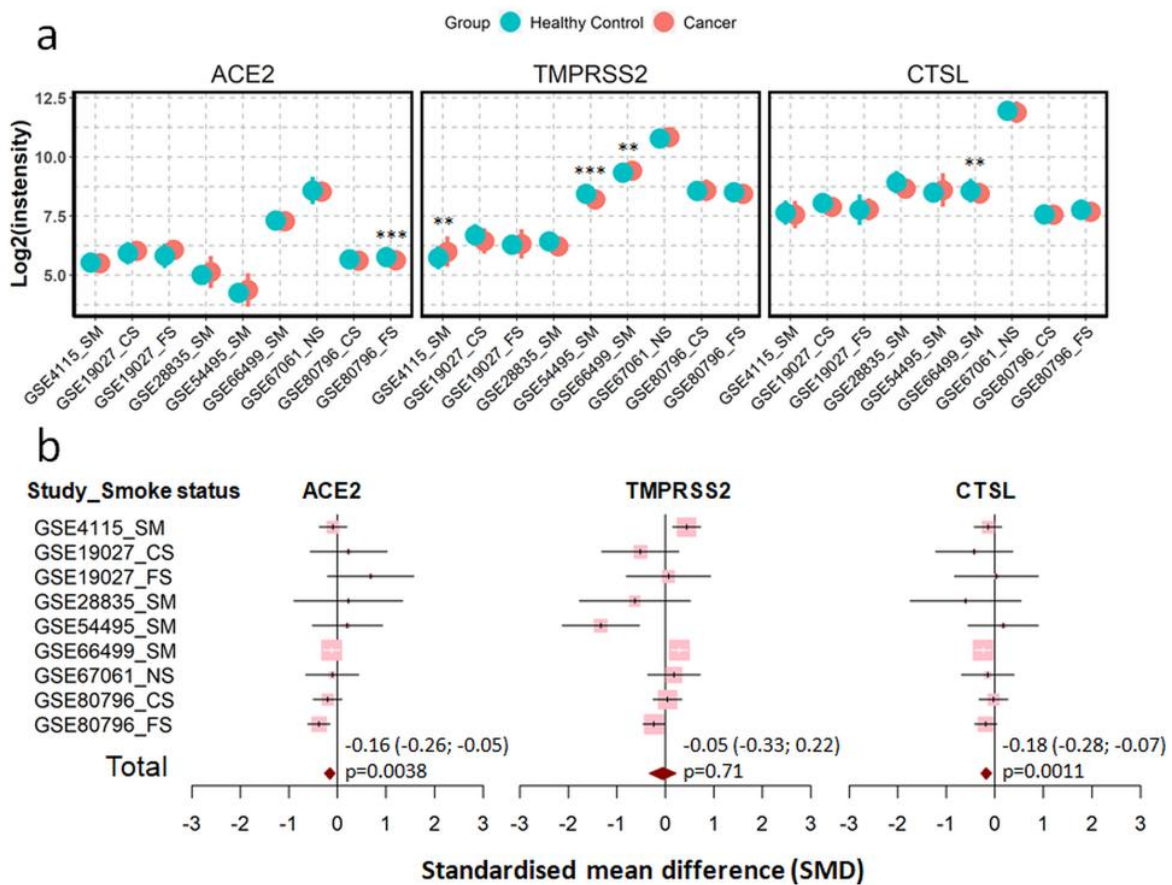

**Supplementary Fig. 6. Expression of ACE2, TMRPSS2 and cathepsin L (CTSL) in airway epithelial cells of healthy controls and patients with lung cancer. a)** Plot of expression levels of ACE2, TMRPSS2 and CTSL in 9 datasets which contain healthy control and patients with lung cancers. Statistical difference was calculated by Student's t test. \* $p < 0.05$ , \*\* $p < 0.01$ , \*\*\* $p < 0.001$ . **b)** Forest plot of 9 datasets examining expression of ACE2, TMRPSS2 and CTSL in healthy controls and patients with lung cancer. The x-axis indicates the standardized mean difference (SMD), while the y-axis shows GEO datasets and cell types. The SMD, 95% CI and p values of meta-analysis are depicted. BEC, bronchial epithelial cells; NEC, nasal epithelial cells; CS, Current smokers; FS, Former smokers; SM, Smokers.



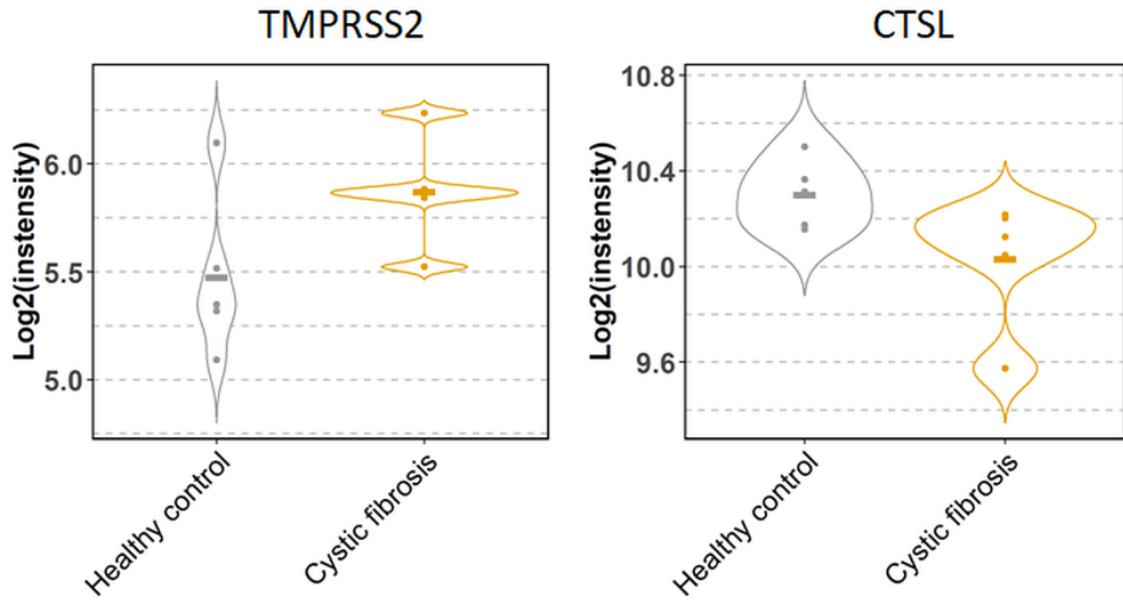

**Supplementary Fig. 7. Expression of TMPRSS2 and cathepsin L (CTSL) in airway epithelial cells of healthy controls (n=5) and patients with cystic fibrosis (n=5) in dataset GSE40445. No significant difference has been observed between the two groups.**

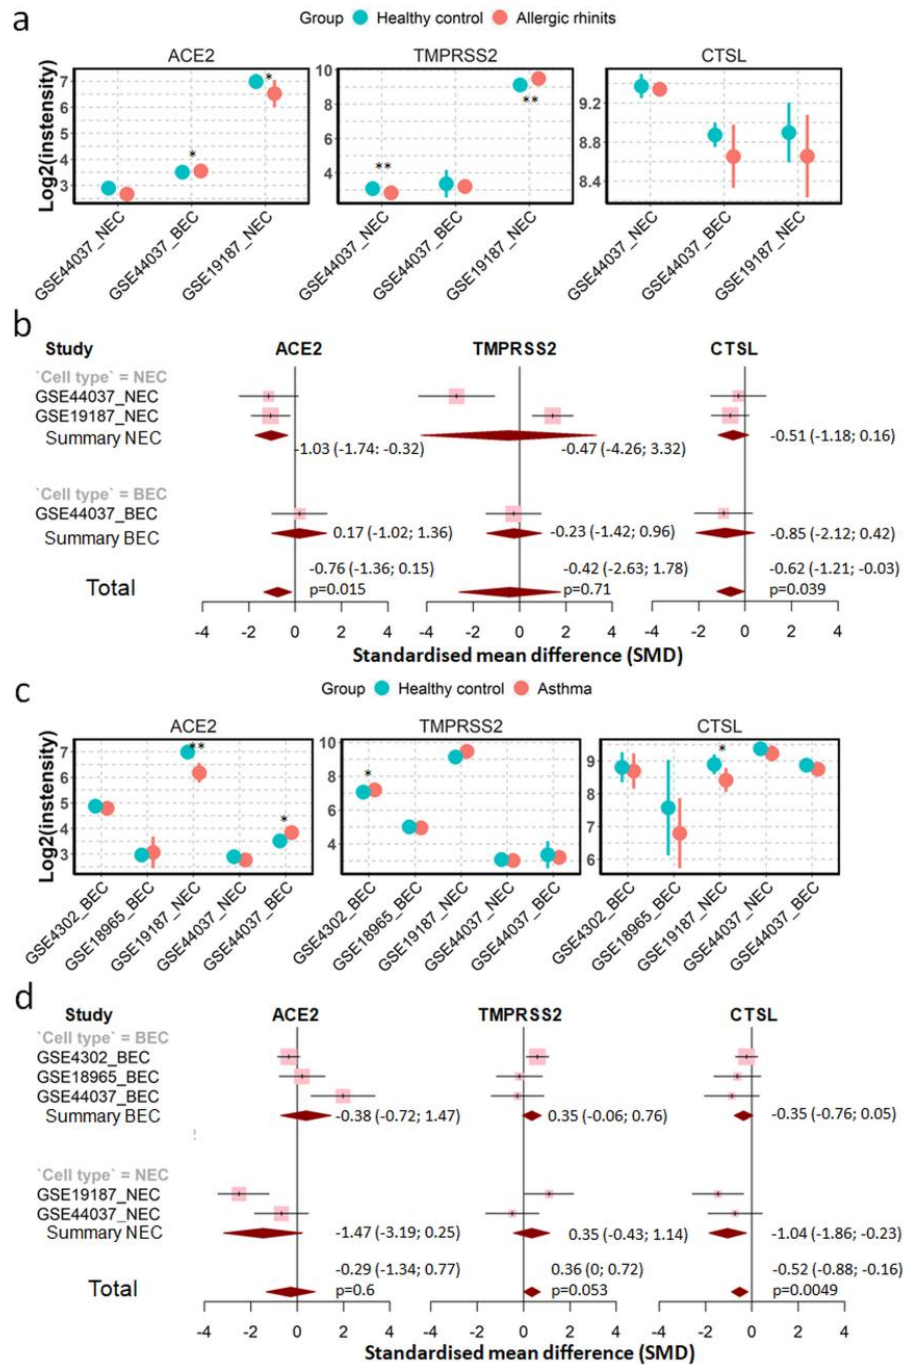

**Supplementary Fig. 8. Expression of ACE2, TMPRSS2 and cathepsin L (CTSL) in airway epithelial cells of healthy controls, patients with asthma and patients with allergic rhinitis. a)** Plot of expression levels of ACE2, TMPRSS2 and CTSL in 3 datasets which contain healthy control and patients with allergic rhinitis. Statistical difference was calculated by Student' t test. \* $p < 0.05$ , \*\* $p < 0.01$ , \*\*\* $p < 0.001$ . **b)** Forest plot of 3 datasets examining expression of ACE2, TMPRSS2 and CTSL in healthy controls and patients with allergic rhinitis. The x-axis indicates the standardized mean difference (SMD), while the y-axis shows GEO datasets and cell types. The SMD, 95% CI and p values of meta-analysis are depicted. **c)** Plot of expression levels of ACE2, TMPRSS2 and CTSL in 5 datasets which contain healthy control and patients with asthma. **d)** Forest plot of 5 datasets examining

expression of ACE2, TMPRSS2 and CTSL in healthy controls and patients with asthma. BEC, bronchial epithelial cells; NEC, nasal epithelial cells.

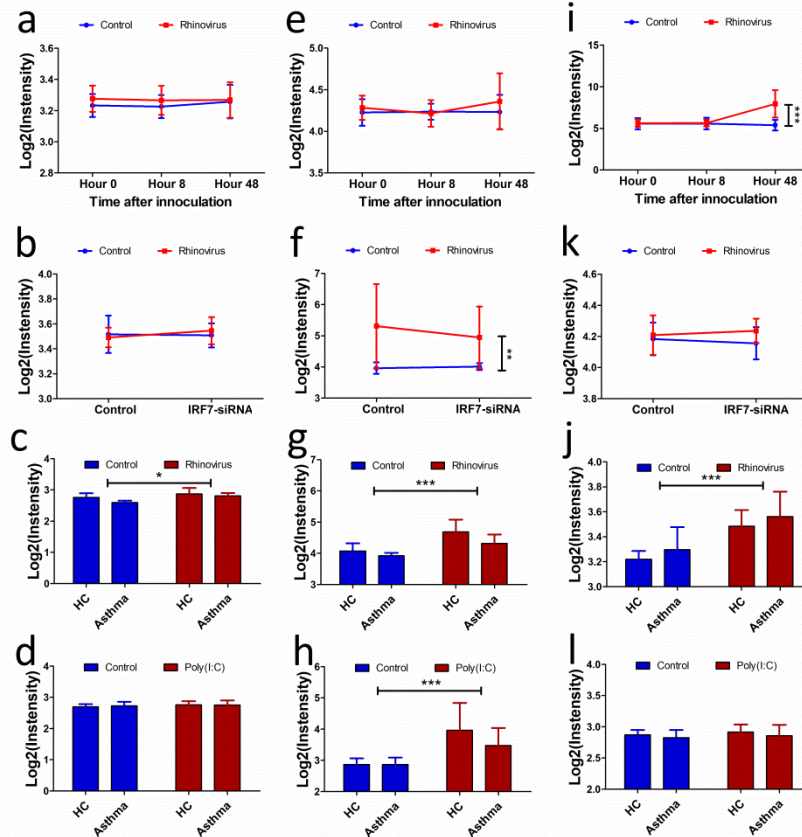

**Supplementary Fig. 9. Expression of IFN- $\alpha$ , IFN- $\beta$  and IFN- $\gamma$  in airway epithelial cells after rhinoviral infection or TLR3 activation.** Kinetics of expression of IFN- $\alpha$  (a), IFN- $\beta$  (e), and IFN- $\gamma$  (i) in airway epithelial cells of healthy subjects artificially infected with rhinovirus or saline control (data from GSE11348). Expression of IFN- $\alpha$  (b), IFN- $\beta$  (f), and IFN- $\gamma$  (j) in airway epithelial cells isolated from healthy subjected and stimulated in vitro with or without rhinovirus in presence or absence of IRF-siRNA (data from GSE70190). Expression of IFN- $\alpha$  (c), IFN- $\beta$  (g), and IFN- $\gamma$  (k) in airway epithelial cells isolated from healthy subjected or patients with asthma and stimulated in vitro with rhinovirus or saline control (data from GSE13396). Expression of IFN- $\alpha$  (d), IFN- $\beta$  (h), and IFN- $\gamma$  (l) in airway epithelial cells isolated from healthy subjected or patients with asthma and stimulated in vitro with polyI:C or or saline control (data from GSE13396). Statistical analysis was performed using two-way ANOVA, Tukey's test for post hoc analysis was performed after two-way ANOVA analysis. \*,  $p < 0.05$ , \*\*,  $p < 0.01$ , \*\*\*,  $p < 0.001$ . HC, healthy control; NS, not significant.
